# Supplementary material for: Microsatellite Polymorphism and the Population Structure of Dugongs (Dugong dugon) in Thailand
Source: MDPI journal article supplement (doi:10.3390/ani12030235), 2022-01-19
Supplement: s1 [file s1]

# Microsatellite polymorphism and the population structure of dugongs (*Dugong dugon*) in Thailand.

**Anocha Poommouang, Promporn Piboon, Kittisak Buddhachat, Janine L. Brown, Wannapimol Kriangwanich, Siriwadee Chomdej, Jatupol Kampuansai, Supamit Mekchay, Patcharaporn Kaewmong, Kongkiat Kittiwattanawong, and Korakot Nganvongpanit**

**Table S3.** Microsatellite polymorphism in dugongs in both the Gulf of Thailand and Andaman Sea.

| Locus     | Genetic variabilities | Andaman Sea (AND) | Gulf of Thailand (GOT) |
|-----------|-----------------------|-------------------|------------------------|
| Tmakb60   | N                     | 41 (59.420%)      | 2 (25.000%)            |
|           | Size range (bp)       | 238-262           | 242                    |
|           | Na                    | 7.000             | 1.000                  |
|           | Ne                    | 2.309             | 1.000                  |
|           | I                     | 1.138             | 0.000                  |
|           | Ho                    | 0.146             | 0.000                  |
|           | He                    | 0.567             | 0.000                  |
| Tma-FWC04 | N                     | 61 (88.406%)      | 8 (100%)               |
|           | Size range (bp)       | 171-191           | 173-183                |
|           | Na                    | 12.000            | 3.000                  |
|           | Ne                    | 6.834             | 2.462                  |
|           | I                     | 2.114             | 0.974                  |
|           | Ho                    | 0.246             | 1.000                  |
|           | He                    | 0.854             | 0.594                  |
| Tma-FWC17 | N                     | 57 (82.609%)      | 5 (62.500%)            |
|           | Size range (bp)       | 219-227           | 219                    |
|           | Na                    | 4.000             | 1.000                  |
|           | Ne                    | 1.457             | 1.000                  |
|           | I                     | 0.608             | 0.000                  |
|           | Ho                    | 0.211             | 0.000                  |
|           | He                    | 0.314             | 0.000                  |
| DduB01    | N                     | 64 (92.754%)      | 6 (75.000%)            |
|           | Size range (bp)       | 320-370           | 326-346                |
|           | Na                    | 22.000            | 3.000                  |
|           | Ne                    | 13.386            | 2.000                  |
|           | I                     | 2.748             | 0.868                  |
|           | Ho                    | 0.828             | 0.667                  |
|           | He                    | 0.925             | 0.500                  |
| DduB02    | N                     | 65 (94.203%)      | 8 (100%)               |

|        |                 |              |             |
|--------|-----------------|--------------|-------------|
|        | Size range (bp) | 218-244      | 218         |
|        | Na              | 5.000        | 1.000       |
|        | Ne              | 1.581        | 1.000       |
|        | I               | 0.765        | 0.000       |
|        | Ho              | 0.415        | 0.000       |
|        | He              | 0.367        | 0.000       |
| DduCO5 | N               | 62 (89.855%) | 7 (87.500%) |
|        | Size range (bp) | 226-264      | 232-250     |
|        | Na              | 19.000       | 2.000       |
|        | Ne              | 11.81        | 2.000       |
|        | I               | 2.640        | 0.693       |
|        | Ho              | 0.823        | 1.000       |
|        | He              | 0.915        | 0.500       |

N=Number of sample, Na = observed number of alleles; Ne = effective number of alleles; I = Shannon's information index; Ho = observed heterozygosity; He = expected heterozygosity.
