# Supplementary material for: Microsatellite Polymorphism and the Population Structure of Dugongs (Dugong dugon) in Thailand
Source: Animals (Basel). 2022 Jan 19;12(3):235. doi: 10.3390/ani12030235 (PMC8833502; doi:10.3390/ani12030235)
Supplement: Supplementary file 1 [file animals-12-00235-s001.zip]

Archive with 4 entries (4 files):
- Figure S1.pdf
- Supplement-Table-1.xlsx
- Supplement-Table-2.xlsx
- Table S3 Microsatellite polymorphism and the population structure of dugongs.pdf
