# Supplementary material for: Microsatellite Polymorphism and the Population Structure of Dugongs (Dugong dugon) in Thailand
Source: Animals (Basel). 2022 Jan 19;12(3):235. doi: 10.3390/ani12030235 (PMC8833502; doi:10.3390/ani12030235)
Supplement: Supplementary file 1 [file animals-12-00235-s001.zip › Supplement-Table-1.xlsx]

## Sheet: Sample data
Microsatellite polymorphism and the population structure of dugongs (Dugong dugon) in Thailand.
Anocha Poommouang, Promporn Piboon, Kittisak Buddhachat, Janine L. Brown, Wannapimol Kriangwanich, Siriwadee Chomdej, Jatupol Kampuansai, Supamit Mekchay, Patcharaporn Kaewmong, Kongkiat Kittiwattanawong, and Korakot Nganvongpanit
Supplement table 1 Information of animal use in this study.
Code	Sex		Body length (Metre)	Habitat		Province	Location	Latitude	Longitude	Zone	Collecting date	Accession number GenBank:
	Male	Female		Aunda	Thai
DU98	/		2.14		/	Rayong	Koh Monnork Is., Klaeng, Rayong	12.5891	101.698	1	1998-10-15	MT542636.1
DU127		/	1.09		/	Chonburi	Sattahip, Chonburi	12.7771	100.903	1	2000-06-13	MT542608.1
DU249		/	1.38		/	Chonburi	Sattahip, Chonburi	12.7771	100.903	1	2000-05-05	MT542635.1
DU392	/		2.63		/	Rayong	Koh Monnork Is., Klaeng, Rayong	12.5891	101.698	1	2016-11-25
DU78		/	2.31		/	Chumphon	Bang Man,Lang Suan, Chumphon	9.82664	99.1432	2	1998-05-19	MT542591.1
DU312		/	2.57		/	Surat Thani	Niyom Beach, Surat Thani	9.43751	99.2777	2	2010-08-12	MT542616.1
DU327	/		1.72		/	Surat Thani	Phumriang, Surat Thani	9.3693	99.2637	2	2011-08-24	MT542530.1
DU367		/	2.4		/	Chumphon	Bang Man,Lang Suan, Chumphon	9.82664	99.1432	2	2014-12-11
DU48		/	2.71	/		Ranong	Mu Ko Kam Is., Ranong	9.48646	98.362	3	1996-03-03	MT542617.1
DU249		/	2	/		Pang-nga	Kuraburi, Pang-nga	8.95599	98.3886	3	2000-03-07	MT542569.1
DU301	/		2.44	/		Pang-nga	Ko Pra Thong, Pang-nga	9.11783	98.2504	3	2009-11-21	MT542540.1
DU380		/	2.6	/		Pang-nga	Ko Kho Khao Is., Phang-nga	8.95805	98.263	3	2016-02-26	MT542571.1
DU396	/			/		Pang-nga	Ko Kho Khao Is., Phang-nga	8.95685	98.2585	3	2017-03-23	MT542572.1
DU420	/		2.46	/		Pang-nga	Khura Buri, Phang-nga	9.21439	98.3424	3	2018-07-29	MT542582.1
DU47	/		2.21	/		Pang-nga	Takuathung, Phang-nga	8.18822	98.4915	4	1996-01-25	MT542621.1
DU84	/		2.19	/		Phuket	Port of Phuket, Muang, Phuket	7.82091	98.4056	4	1998-08-02	MT542606.1
DU128	/			/		Phuket	Port of Phuket, Muang, Phuket	7.82091	98.4056	4	2000-10-25
DU268	/		1.92	/		Phuket	Ao Kung, Pa Klok, Phuket	8.02369	98.4137	4	2002-01-08	MT542593.1
DU146	/		2.14	/		Phuket	Ban Ao Nam Bo, Phuket	7.81727	98.4055	4	2002-03-28	MT542539.1
DU314		/	1.11	/		Pang-nga	Ko Yao Noi Is., Phang-nga	8.11875	98.5849	4	2010-08-14	MT542594.1
DU341		/	2.67	/		Phuket	Yamu, Phuket	7.99226	98.4222	4	2012-11-06	MT542538.1
DU350		/	1.38	/		Phuket	Koh Tapao Is., Phuket	7.8423	98.4313	4	2013-03-11	MT542600.1
DU351	/		1.09	/		Krabi	Koh Jum, Krabi	7.84973	98.9761	4	2013-04-19	MT542542.1
DU352	/		1.76	/		Phuket	Koh Tapao Noi Is., Phuket	7.83266	98.4211	4	2013-05-06	MT542622.1
DU401	/		1.87	/		Krabi	Koh Phi Phi, Krabi	7.74056	98.7707	4	2017-06-18	MT542570.1
DU419		/	2.81	/		Krabi	Koh Khlong, Krabi	7.71824	99.0351	4	2018-06-29	MT542589.1
DU427		/	2.7	/		Pang-nga	Ko Pa Nak Is., Phang-nga	8.19786	98.4963	4	2019-01-23	MT542611.1
DU439	/		2.99	/		Krabi	Bamboo Island, Krabi	7.82505	98.8628	4	2019-07-14	MT542596.1
DU441	/		2.57	/		Krabi	Ton Sai Bay, Railay, Krabi	7.73375	98.7811	4	2019-08-18	MT542585.1
DU34		/	2.55	/		Trang	Talibong Is., Kantang, Trang	7.23623	99.414	5	1994-12-14	MT542634.1
DU36		/	2.73	/		Trang	Sikao, Trang	7.6172	99.2721	5	1995-03-31	MT542544.1
DU60	/		1.92	/		Trang	Hat-Samran, Trang	7.20432	99.5592	5	1997-03-18	MT542604.1
DU103		/	1.67	/		Trang	Talibong Is., Kantang, Trang	7.26243	99.4049	5	1999-01-28	MT542525.1
DU120	/		1.51	/		Trang	Kantang, Trang	7.37403	99.3415	5	2000-03-07	MT542614.1
DU260		/	1.74	/		Trang	Talibong Is., Kantang, Trang	7.26395	99.3985	5	2000-06-13	MT542556.1
DU276	/		1.4	/		Satun	Ko Sarai Is., Satun	6.66874	99.8547	5	2002-03-08	MT542529.1
DU299		/	2.81	/		Trang	Talibong Is., Kantang, Trang	7.26977	99.4248	5	2002-03-28	MT542526.1
DU300		/	2.24	/		Trang	Ban Na Chum Het, Trang	7.15226	99.5831	5	2009-10-05	MT542610.1
DU306		/	2.02	/		Trang	Ban Phra Muang, Trang	7.29773	99.4398	5	2010-01-22	MT542595.1
DU307		/	2.78	/		Trang	Talibong Is., Kantang, Trang	7.26343	99.4099	5	2010-01-24	MT542535.1
DU310	/		2.33	/		Trang	Mot Tanoi Beach, Trang	7.30057	99.4297	5	2010-05-06	MT542536.1
DU311		/	1.07	/		Trang	Yonglam Beach, Trang	7.36018	99.3556	5	2010-07-15	MT542533.1
DU315	/		1.34	/		Trang	Talibong Is., Kantang, Trang	7.26605	99.4641	5	2010-11-14	MT542619.1
DU323	/		1.92	/		Trang	Talibong Is., Kantang, Trang	7.28275	99.3849	5	2011-03-26	MT542527.1
DU324	/		1.6	/		Trang	Talibong Is., Kantang, Trang	7.25146	99.4559	5	2011-04-11	MT542576.1
DU328		/	2.59	/		Satun	Thung Bu Lang, Satun	7.02499	99.6727	5	2011-09-11	MT542580.1
DU329		/	1.63	/		Trang	Talibong Is., Kantang, Trang	7.26343	99.4099	5	2011-12-23	MT542601.1
DU336	/		2	/		Trang	Na Chumhet, Trang	7.21352	99.5539	5	2012-05-18	MT542597.1
DU337	/		2.81	/		Trang	Ko Muk Is., Trang	7.39365	99.2983	5	2012-07-28	MT542531.1
DU339	/		1.16	/		Trang	Talibong Is., Kantang, Trang	7.25146	99.4159	5	2012-10-11	MT542575.1
DU340		/	1.58	/		Trang	Talibong Is., Kantang, Trang	7.21913	99.4006	5	2012-10-24	MT542537.1
DU344		/	1.6	/		Trang	Ko Sukon Is., Trang	7.13216	99.585	5	2012-12-10	MT542521.1
DU346	/		2.14	/		Trang	Mot Tanoi Beach, Trang	7.30938	99.4145	5	2012-12-21	MT542579.1
DU347		/	2.58	/		Krabi	Ban Bo Muang, Krabi	7.67598	99.2158	5	2012-12-27	MT542624.1
DU349		/	2.35	/		Trang	Sapan Mai Pier, Trang	7.15806	99.5952	5	2013-02-09	MT542566.1
DU354		/	2.04	/		Trang	Yao Beach, Trang	7.31223	99.3876	5	2013-07-07	MT542584.1
DU355	/		2.14	/		Trang	Pak Meng Beach, Trang	7.46495	99.2606	5	2013-08-29
DU359	/		2.11	/		Trang	Pak Meng Beach, Trang	7.46495	99.2606	5	2014-02-07	MT542543.1
DU364	/		3.64	/		Trang	Ko Chambi Is., Trang	7.13367	99.5729	5	2014-09-08	MT542581.1
DU366		/	2.55	/		Trang	Bo Hin, Trang	7.49691	99.2536	5	2014-11-29	MT542568.1
DU372		/	1.25	/		Trang	Goh Nok Is., Trang	7.26751	99.4745	5	2015-05-04	MT542564.1
DU373		/	2.48	/		Krabi	Ko Lao Ku Long Is., Krabi	7.64986	99.193	5	2015-05-20	MT542532.1
DU374		/	1.3	/		Satun	Bakan Yai Is., Satun	6.71366	99.8397	5	2015-06-15	MT542605.1
DU378		/	1.54	/		Trang	Ko Sukon Is., Trang	7.11599	99.4297	5	2015-12-03	MT542615.1
DU384		/	1.01	/		Trang	Ko Muk Is., Trang	7.34829	99.3015	5	2016-07-21	MT542637.1
DU388		/	2.66	/		Trang	Huai To, Trang	7.60016	99.2774	5	2016-10-12	MT542562.1
DU389		/	1.32	/		Trang	Ban Laem Makham, Trang	7.62676	99.2737	5	2016-10-13	MT542567.1
DU398	/		1.09	/		Trang	Ko Kradan Is., Trang	7.30834	99.3389	5	2017-04-25	MT542586.1
DU405	/		2.63	/		Trang	Hat Chao Mai National Park, Trang	7.4202	99.3431	5	2017-09-08	MT542603.1
DU417	/		1.2	/		Trang	Talibong Is., Kantang, Trang	7.24399	99.4517	5	2018-05-12	MT542623.1
DU421		/	2.3	/		Trang	Talibong Is., Kantang, Trang	7.22947	99.3996	5	2018-08-29	MT542549.1
DU422	/		2.2	/		Trang	Sai Thong Beach, Trang	7.11132	99.5804	5	2018-10-19	MT542598.1
DU423		/	2.35	/		Trang	Talibong Is., Kantang, Trang	7.29509	99.3992	5	2018-11-26	MT542602.1
DU428	/		1.32	/		Trang	Talibong Is., Kantang, Trang	7.24459	99.4283	5	2019-02-16	MT542587.1
DU430		/	2.02	/		Satun	Ko Kluai Is., Satun	7.01166	99.5708	5	2019-03-14	MT542588.1
DU440	/		1.29	/		Trang	Talibong Is., Kantang, Trang	7.24169	99.4506	5	2019-07-14	MT542548.1
DU442		/	1.23	/		Trang	Bantase, Trang	7.36046	99.3691	5	2019-08-22	MT542563.1
