# Supplementary material for: Microsatellite Polymorphism and the Population Structure of Dugongs (Dugong dugon) in Thailand
Source: Animals (Basel). 2022 Jan 19;12(3):235. doi: 10.3390/ani12030235 (PMC8833502; doi:10.3390/ani12030235)
Supplement: Supplementary file 1 [file animals-12-00235-s001.zip › Supplement-Table-2.xlsx]

## Sheet: Sheet1
Microsatellite polymorphism and the population structure of dugongs (Dugong dugon) in Thailand.
Anocha Poommouang, Promporn Piboon, Kittisak Buddhachat, Janine L. Brown, Wannapimol Kriangwanich, Siriwadee Chomdej, Jatupol Kampuansai, Supamit Mekchay, Patcharaporn Kaewmong, Kongkiat Kittiwattanawong, and Korakot Nganvongpanit
Supplementary Table 2 Allele frequency distributions and statistical parameters of forensic interest for each population.
Allele Frequencies by Locus
Locus	Allele	All
DduB01	320	0.05
	322	0.02143
	324	0.08571
	326	0.11429
	328	0.09286
	330	0.10714
	332	0.04286
	334	0.04286
	336	0.02857
	346	0.00714
	352	0.01429
	354	0.06429
	356	0.02143
	357	0.00714
	358	0.05
	359	0.01429
	360	0.09286
	362	0.01429
	364	0.06429
	366	0.04286
	368	0.00714
	370	0.01429
Locus	Allele	All
Tmakb60	238	0.02326
	240	0.03488
	242	0.05814
	246	0.25581
	248	0.59302
	250	0.01163
	262	0.02326
Locus	Allele	All
Tma-FWC17	219	0.83065
	221	0.02419
	223	0.12903
	227	0.01613
Locus	Allele	All
DduCO5	226	0.01449
	228	0.05797
	230	0.11594
	232	0.14493
	234	0.08696
	236	0.0942
	238	0.02899
	240	0.02899
	242	0.00725
	244	0.00725
	245	0.00725
	246	0.04348
	248	0.06522
	250	0.10145
	252	0.06522
	254	0.05797
	256	0.03623
	258	0.02899
	264	0.00725
Locus	Allele	All
Tma-FWC04	171	0.03623
	173	0.02174
	175	0.06522
	177	0.01449
	179	0.07246
	181	0.15217
	182	0.00725
	183	0.24638
	185	0.15217
	187	0.13043
	189	0.08696
	191	0.01449
Locus	Allele	All
DduB02	218	0.79452
	236	0.05479
	240	0.04795
	242	0.09589
	244	0.00685

## Sheet: Sheet2
Heterozygosity, Fstatistics and Polymorphism by Population for Codominant Data
*With Step by Step option
Data Sheet	Sheet1
Data Title
No. Loci	6
No. Samples	77
No. Pops.	2
Sample Size, No. Alleles, No. Effective Alleles, Information Index, Observed Heterozygosity, Expected and Unbiased Expected Heterozygosity, and Fixation Index
Pop	Locus	N	Na	Ne	I	Ho	He	uHe	F
AND	Tma-FWC04	61	12	6.83379	2.11394	0.245902	0.853668	0.860723	0.711947
	Tmakb60	41	7	2.30907	1.13762	0.146341	0.566924	0.573924	0.741868
	Tma-FWC17	57	4	1.45728	0.608345	0.210526	0.313789	0.316566	0.329083
	DduB01	64	21	13.3856	2.74845	0.828125	0.925293	0.932579	0.105013
	DduB02	65	5	1.58092	0.764636	0.415385	0.367456	0.370304	-0.130435
	DduCO5	62	19	11.8095	2.64044	0.822581	0.915323	0.922764	0.101322
GOT	Tma-FWC04	8	3	2.46154	0.974315	1	0.59375	0.633333	-0.684211
	Tmakb60	2	1	1	0	0	0	0	#N/A
	Tma-FWC17	5	1	1	0	0	0	0	#N/A
	DduB01	6	3	2	0.867563	0.666667	0.5	0.545455	-0.333333
	DduB02	8	1	1	0	0	0	0	#N/A
	DduCO5	7	2	2	0.693147	1	0.5	0.538462	-1
Mean and SE over Loci for each Pop
Pop		N	Na	Ne	I	Ho	He	uHe	F
AND	Mean	58.3333	11.3333	6.22937	1.6689	0.44481	0.657075	0.66281	0.3098
	SE	3.64844	2.97396	2.17918	0.388677	0.125704	0.113598	0.114436	0.144682
GOT	Mean	6	1.83333	1.57692	0.422504	0.444444	0.265625	0.286208	-0.672515
	SE	0.930949	0.401386	0.267024	0.192471	0.204879	0.11961	0.128722	0.136146
Grand Mean and SE over Loci and Pops
		N	Na	Ne	I	Ho	He	uHe	F
Total	Mean	32.1667	6.58333	3.90314	1.0457	0.444627	0.46135	0.474509	-0.0176385
	SE	8.09118	2.02432	1.25993	0.279393	0.114591	0.0983205	0.0998269	0.17018
F-Statistics and Estimates of Nm over All Pops for each Locus
All Pops.	Locus	Ht	Mean He	Mean Ho		Fis	Fit	Fst		Nm
	Tma-FWC04	0.808064	0.723709	0.622951		0.139225	0.229082	0.104391		2.14485
	Tmakb60	0.623438	0.283462	0.0731707		0.741868	0.882634	0.545324		0.208443
	Tma-FWC17	0.170552	0.156894	0.105263		0.329083	0.382811	0.0800812		2.87183
	DduB01	0.821167	0.712646	0.747396		-0.048761	0.089837	0.132154		1.64173
	DduB02	0.199556	0.183728	0.207692		-0.130435	-0.0407709	0.079318		2.90187
	DduCO5	0.793347	0.707661	0.91129		-0.287749	-0.148666	0.108005		2.06471
					Mean	0.123872	0.232488	0.174879		1.97224
					SE	0.151457	0.151173	0.0745239		0.405464
Percentage of Polymorphic Loci
Population	%P
AND	1
GOT	0.5
Mean	0.75
SE	0.25
Na = No. of Different Alleles
Ne = No. of Effective Alleles = 1 / (Sum pi^2)
I = Shannon's Information Index = -1* Sum (pi * Ln (pi))
Ho = Observed Heterozygosity = No. of Hets / N
He = Expected Heterozygosity = 1 - Sum pi^2
uHe = Unbiased Expected Heterozygosity = (2N / (2N-1)) * He
F = Fixation Index = (He - Ho) / He = 1 - (Ho / He)
Where pi is the frequency of the ith allele for the population & Sum pi^2 is the sum of the squared population allele frequencies.
Fis = (Mean He - Mean Ho) / Mean He
Fit = (Ht - Mean Ho) / Ht
Fst = (Ht - Mean He) / Ht
Nm = [(1 / Fst) - 1] / 4
Key: Mean He = Average He across the populations. Mean Ho = Average Ho across the populations.
Ht = Total Expected Heterozygosity = 1 - Sum tpi^2 where tpi is the frequency of the ith allele for the total & Sum tpi^2 is the sum of the squared total allele frequencies.
Note:
Warning! Results should be treated with caution given the following:
There is 11% missing data at the locus 'Tma-FWC04' in the population 'AND!
There is 40% missing data at the locus 'Tmakb60' in the population 'AND!
There is 75% missing data at the locus 'Tmakb60' in the population 'GOT!
There is 17% missing data at the locus 'Tma-FWC17' in the population 'AND!
There is 37% missing data at the locus 'Tma-FWC17' in the population 'GOT!
There is 7% missing data at the locus 'DduB01' in the population 'AND!
There is 25% missing data at the locus 'DduB01' in the population 'GOT!
There is 10% missing data at the locus 'DduCO5' in the population 'AND!
There is 12% missing data at the locus 'DduCO5' in the population 'GOT!
